# Supplementary material for: Formation of N-heterocyclic, donor-stabilized borenium ions
Source: Royal Society of Chemistry journal article supplement (doi:10.1039/c1cc11789k), 2011-01-01
Supplement: c1cc11789k.pdf [file c1cc11789k.pdf]

*Electronic Supplementary Information for:*

## **Formation of N-heterocyclic, donor-stabilised borenium ions†**

**Chika I. Someya, Shigeyoshi Inoue, Carsten Präsang, Elisabeth Irran, and Matthias Driess\***

*Institute of Chemistry: Metalorganics and Inorganic Materials, Technische Universität Berlin, Strasse des 17. Juni*

*135, Sekr. C2, D-10623 Berlin, Germany*

E-mail: [matthias.driess@tu-berlin.de](mailto:matthias.driess@tu-berlin.de)

### **General Considerations**

All experiments and manipulations were carried out under dry oxygen-free nitrogen using standard Schlenk techniques or in an MBraun inert atmosphere glovebox containing an atmosphere of purified nitrogen. Solvents were dried by standard methods and freshly distilled prior to use. The  $^1\text{H}$ ,  $^{13}\text{C}$ , and  $^{11}\text{B}$  NMR spectra were recorded on a Bruker Spectrometer AM200, AM400 and referenced to solvent resonances. The starting material,  $\beta$ -diketiminato ligand  $\text{L}^{[1]}$  was prepared according to the literature. Abbreviations:  $\text{L} = \{\text{HC}[\text{CMeN}(\text{Ar})_2]\}^-$ ,  $\text{L}' = \{\text{HC}[\text{C}(\text{Me})(\text{C}=\text{CH}_2)\text{N}(\text{Ar})_2]\}$ ,  $\text{Ar} = 2,6\text{-diisopropylphenyl}$ ,  $\text{OTf} = \text{OSO}_2\text{CF}_3$ , s = singlet; d = doublet; t = triplet; sept = septet; mult = multiplet; br = broad.

**Single-Crystal X-ray Structure Determinations:** Crystals were each mounted on a glass capillary in perfluorinated oil and measured in a cold  $\text{N}_2$  flow. The data of compounds **2** and **4** were collected on an Oxford Diffraction Xcalibur S Sapphire at 150 K (Mo-  $\text{K}\alpha$  radiation,  $\lambda = 0.71073 \text{ \AA}$ ). The structures were solved by direct methods and refined on  $F^2$  with the SHELX-97 software package.<sup>[2]</sup> The positions of the H atoms were calculated and considered isotropically according to a riding model.

## Experimental selections

### Synthesis of [LBBr]<sup>+</sup>[BBr<sub>4</sub>]<sup>-</sup> **1**

To a solution of LH (5.0 g, 12.0 mmol) in toluene (20 mL) at -78 °C was slowly added *n*-BuLi (7.5 mL, 1.6 M in *n*-hexane, 12.0 mmol). The solution was slowly warmed to room temperature and stirred for 5 hours. BBr<sub>3</sub> (1.2 mL, 12.0 mmol) was added to this solution at -78 °C. After stirring overnight, the precipitate was filtered off and extracted by dichloromethane. The filtrate was concentrated and stored at -12 °C overnight to give pale yellow crystals of **1** (3.6 g, 36%).

<sup>1</sup>H NMR (400.13 MHz, CDCl<sub>3</sub>, 298K): δ = 1.11 (d, <sup>3</sup>J<sub>HH</sub> = 6.8 Hz, 12 H, CHMe<sub>2</sub>), 1.05 (d, <sup>3</sup>J<sub>HH</sub> = 6.8 Hz, 12 H, CHMe<sub>2</sub>), 2.47 (s, 6 H, NCM<sub>e</sub>), 2.16 (sept, <sup>3</sup>J<sub>HH</sub> = 6.7 Hz, 4 H, CHMe<sub>2</sub>), 7.21 - 7.47 (m, 6 H, 2,6-*i*Pr<sub>2</sub>C<sub>6</sub>H<sub>3</sub>), 9.07 (s, 1 H, γ-CH); <sup>13</sup>C{<sup>1</sup>H}NMR (100.61 MHz, CDCl<sub>3</sub>, 298K): δ = 23.08 (NCMe<sub>2</sub>), 23.8, 24.05 (CHMe<sub>2</sub>), 29.04 (CHMe<sub>2</sub>), 116.42 (γ-CH), 125.58, 131.12, 134.98, 142, 25 (2,6-*i*Pr<sub>2</sub>C<sub>6</sub>H<sub>3</sub>), 173.13 (N-C); <sup>11</sup>B NMR (128.27 MHz, CDCl<sub>3</sub>, 298K): δ = -24.6 (BBr<sub>4</sub>), 29.9 (B-Br); Mp: 251-252 °C (decomposed); ESI-MS *m/z* (%): 508.25 [LBBr]<sup>+</sup>.

### Synthesis of L'BBr **2**

A THF solution of lithium naphthalenide (20 ml, 6.0 mmol) was added to compound **1** (1.2 g, 1.4 mmol) in THF (20 mL) at -78 °C, and then the reaction mixture was stirred for 2 h. After removal of solvent in vacuo, the residue was extracted with pentane. The resulting solution was concentrated and stored at -12 °C to give yellow crystals of **2** (0.2 g, 28%).

<sup>1</sup>H NMR (400.13 MHz, CDCl<sub>3</sub>, 298K): δ = 1.22 (d, <sup>3</sup>J<sub>HH</sub> = 6.9 Hz, 6 H, CHMe<sub>2</sub>), 1.23 (d, <sup>3</sup>J<sub>HH</sub> = 6.9 Hz, 6 H, CHMe<sub>2</sub>), 1.26 (d, <sup>3</sup>J<sub>HH</sub> = 6.9 Hz, 6 H, CHMe<sub>2</sub>), 1.27 (d, <sup>3</sup>J<sub>HH</sub> = 6.9 Hz, 6 H, CHMe<sub>2</sub>), 1.59 (s, 3 H, NCM<sub>e</sub>), 3.19 (sept, <sup>3</sup>J<sub>HH</sub> = 6.5 Hz, 4 H, CHMe<sub>2</sub>), 3.00 (s, 1 H, NCCH<sub>2</sub>), 3.76 (s, 1 H, NCCH<sub>2</sub>), 5.58 (s, 1 H, γ-CH), 7.17-7.26 (m, 6 H, 2,6-*i*Pr<sub>2</sub>C<sub>6</sub>H<sub>3</sub>); <sup>13</sup>C{<sup>1</sup>H}NMR (100.61 MHz, CDCl<sub>3</sub>, 298K): δ = 20.72 (NCMe), 24.09, 24.24, 24.4, 25.24 (CHMe<sub>2</sub>), 28.56, 28.6 (CHMe<sub>2</sub>), 83.93 (NCCH<sub>2</sub>), 106.62 (γ-CH), 123.97, 124.38, 127.96, 128.3, 138.0, 138.16, 140.48, 145.8 (2,6-*i*Pr<sub>2</sub>C<sub>6</sub>H<sub>3</sub>), 146.42 (NC=CH<sub>2</sub>), 146.64 (NCMe); <sup>11</sup>B NMR (128.27 MHz, CDCl<sub>3</sub>, 298K): δ = 27.2 ppm; M.p. 198-199 °C (decomposed).

HRMS calc. for C<sub>29</sub>H<sub>40</sub>BBrN<sub>2</sub>: 506.4679, found: 506.4548.

### Synthesis of [LBBr]<sup>+</sup>[OTf]<sup>-</sup> **3**

Trifluoromethanesulfonic acid (0.35 g, 2.4 mmol) was dropwise added with stirring to a cooled (-60°C) solution of **2** (1.0 g, 2.0 mmol) in CH<sub>2</sub>Cl<sub>2</sub> (2 mL). The reaction mixture was slowly warmed to room temperature and stirred overnight. The solvent was removed in vacuo and the residue was extracted with toluene (30 mL). Filtration and subsequent concentration afforded crystals of **3** (0.2 g, 0.3 mmol, 18%).

<sup>1</sup>H NMR (400.13 MHz, CDCl<sub>3</sub>, 298K): δ = 1.18 (d, <sup>3</sup>J<sub>HH</sub> = 6.8 Hz, 12 H, CHMe<sub>2</sub>), 1.24 (d, <sup>3</sup>J<sub>HH</sub> = 6.8 Hz, 12 H, CHMe<sub>2</sub>), 2.37 (sept, <sup>3</sup>J<sub>HH</sub> = 6.8 Hz, 4 H, CHMe<sub>2</sub>), 2.50 (s, 6 H, NCMe), 7.37 (d, <sup>2</sup>J<sub>HH</sub> = 7.8 Hz, 4 H, 2,6-*i*Pr<sub>2</sub>C<sub>6</sub>H<sub>3</sub>), 7.83 (t, <sup>2</sup>J<sub>HH</sub> = 7.8 Hz, 2 H, 2,6-*i*Pr<sub>2</sub>C<sub>6</sub>H<sub>3</sub>), 7.95 (s, 1 H, γ-CH); <sup>13</sup>C{<sup>1</sup>H}NMR (100.61 MHz, CDCl<sub>3</sub>, 298K): δ = 23.25 (NCMe<sub>2</sub>), 24.1, 24.33 (CHMe<sub>2</sub>), 29.15 (CHMe<sub>2</sub>), 116.3 (γ-CH), 125.8, 131.23, 135.52, 142.96 (2,6-*i*Pr<sub>2</sub>C<sub>6</sub>H<sub>3</sub>), 173.32 (NCMe); <sup>11</sup>B NMR (128.27 MHz, CDCl<sub>3</sub>, 298K): δ = 29.8 ppm; M.p. 231-232 °C; ESI-MS m/z (%): 508.25 [LBBr]<sup>+</sup>.

### Synthesis of [LB-L'BBr]<sup>+</sup>[Br]<sup>-</sup> **4**

When a mixture of **2** (0.1 g, 0.2 mmol) and CHCl<sub>3</sub> (0.5 ml) in a sealed NMR tube was kept at 110°C for 4 days in the dark, the yellow solution turned gradually to violet. The quantitative formation of **4** was confirmed by NMR spectroscopy. The volatiles were removed in vacuo and the residue was extracted with toluene (5 mL). Filtration and subsequent concentration afforded crystals of **4** (89.1 mg, 89 %).

<sup>1</sup>H NMR (400.13 MHz, CDCl<sub>3</sub>, 298K): δ = 1.09 (d, <sup>3</sup>J<sub>HH</sub> = 6.8 Hz, 6 H, CHMe<sub>2</sub>), 1.10 (d, <sup>3</sup>J<sub>HH</sub> = 6.8 Hz, 6 H, CHMe<sub>2</sub>), 1.13 (d, <sup>3</sup>J<sub>HH</sub> = 6.8 Hz, 12 H, CHMe<sub>2</sub>), 1.15 (d, <sup>3</sup>J<sub>HH</sub> = 6.8 Hz, 6 H, CHMe<sub>2</sub>), 1.20 (d, <sup>3</sup>J<sub>HH</sub> = 6.8 Hz, 6 H, CHMe<sub>2</sub>), 1.22 (d, <sup>3</sup>J<sub>HH</sub> = 6.8 Hz, 12 H, CHMe<sub>2</sub>), 2.18 (NCMe), 2.27 (sept, <sup>3</sup>J<sub>HH</sub> = 6.8 Hz, 4 H, CHMe<sub>2</sub>), 2.57 (s, 6 H, NCMe), 2.66 (sept, <sup>3</sup>J<sub>HH</sub> = 6.8 Hz, 4 H, CHMe<sub>2</sub>), 4.84 (s, 1 H, γ-CH), 7.20-7.54 (m, 6 H, 2,6-*i*Pr<sub>2</sub>C<sub>6</sub>H<sub>3</sub>), 9.33 (s, 1 H, γ-CH); <sup>13</sup>C{<sup>1</sup>H}NMR (100.61 MHz, CDCl<sub>3</sub>, 298K): δ = 21.39 (NCMe), 23.04 (NCMe<sub>2</sub>), 23.97, 24.05, 24.11, 24.15, 24.18, 24.29 (CHMe<sub>2</sub>), 28.7, 28.73, 29.2 (CHMe<sub>2</sub>), 46.31 (NC=CHBr), 106.00 (γ-CH), 116.41 (γ-CH), 124.59, 124.80, 125.71, 128.28, 129.09, 131.27, 133.83, 135.18, 135.28, 142.6, 142.75, 144.46 (2,6-*i*Pr<sub>2</sub>C<sub>6</sub>H<sub>3</sub>), 144.47 (NC=CHBr), 144.57 (NCMe), 173.74 (NCMe); <sup>11</sup>B NMR (128.27 MHz, CDCl<sub>3</sub>, 298K): δ = 27.3, 29.6. M.p. 281-282 °C; ESI-MS m/z (%): 934.57 [LB-L'BBr]<sup>+</sup>.

## Crystallographic data for compound 2

|                                   |                                                     |                 |
|-----------------------------------|-----------------------------------------------------|-----------------|
| Empirical formula                 | C <sub>29</sub> H <sub>40</sub> B Br N <sub>2</sub> |                 |
| Formula weight                    | 507.35                                              |                 |
| Temperature                       | 150(2) K                                            |                 |
| Wavelength                        | 0.71073 Å                                           |                 |
| Crystal system                    | Monoclinic                                          |                 |
| Space group                       | P2 <sub>1</sub> /n                                  |                 |
| Unit cell dimensions              | a = 12.5324(9) Å                                    | α = 90°         |
|                                   | b = 16.4444(11) Å                                   | β = 103.889(9)° |
|                                   | c = 13.7137(13) Å                                   | γ = 90°         |
| Volume                            | 2743.6(4) Å <sup>3</sup>                            |                 |
| Z                                 | 4                                                   |                 |
| Density (calculated)              | 1.228 Mg/m <sup>3</sup>                             |                 |
| Absorption coefficient            | 1.517 mm <sup>-1</sup>                              |                 |
| F(000)                            | 1072                                                |                 |
| Crystal size                      | 0.38 x 0.32 x 0.17 mm <sup>3</sup>                  |                 |
| Theta range for data collection   | 3.06 to 25.00°.                                     |                 |
| Index ranges                      | -14 ≤ h ≤ 11, -19 ≤ k ≤ 19, -16 ≤ l ≤ 16            |                 |
| Reflections collected             | 14104                                               |                 |
| Independent reflections           | 4825 [R(int) = 0.1044]                              |                 |
| Completeness to theta = 25.00°    | 99.6 %                                              |                 |
| Absorption correction             | Semi-empirical from equivalents                     |                 |
| Max. and min. transmission        | 0.7825 and 0.5964                                   |                 |
| Refinement method                 | Full-matrix least-squares on F <sup>2</sup>         |                 |
| Data / restraints / parameters    | 4825 / 288 / 306                                    |                 |
| Goodness-of-fit on F <sup>2</sup> | 1.028                                               |                 |
| Final R indices [I > 2σ(I)]       | R1 = 0.0788, wR2 = 0.1681                           |                 |
| R indices (all data)              | R1 = 0.1572, wR2 = 0.1905                           |                 |
| Largest diff. peak and hole       | 0.725 and -0.596 e.Å <sup>-3</sup>                  |                 |

Table 1. Bond lengths [ $\text{\AA}$ ] and angles [ $^\circ$ ] for 4.

|                |           |                   |          |
|----------------|-----------|-------------------|----------|
| Br(1)-B(1)     | 1.932(8)  | C(2)-N(1)-C(6)    | 117.6(5) |
| N(1)-C(2)      | 1.411(8)  | B(1)-N(1)-C(6)    | 122.8(6) |
| N(1)-B(1)      | 1.412(9)  | C(4)-N(2)-B(1)    | 118.9(5) |
| N(1)-C(6)      | 1.462(8)  | C(4)-N(2)-C(18)   | 117.2(5) |
| N(2)-C(4)      | 1.413(8)  | B(1)-N(2)-C(18)   | 123.8(6) |
| N(2)-B(1)      | 1.417(9)  | N(1)-B(1)-N(2)    | 121.8(6) |
| N(2)-C(18)     | 1.458(8)  | N(1)-B(1)-Br(1)   | 119.0(5) |
| C(1)-C(2)      | 1.401(9)  | N(2)-B(1)-Br(1)   | 119.2(5) |
| C(2)-C(3)      | 1.417(9)  | C(1)-C(2)-N(1)    | 121.6(6) |
| C(3)-C(4)      | 1.379(9)  | C(1)-C(2)-C(3)    | 121.8(6) |
| C(4)-C(5)      | 1.444(9)  | N(1)-C(2)-C(3)    | 116.6(6) |
| C(6)-C(7)      | 1.384(9)  | C(4)-C(3)-C(2)    | 125.2(6) |
| C(6)-C(11)     | 1.405(9)  | C(3)-C(4)-N(2)    | 117.8(6) |
| C(7)-C(8)      | 1.399(9)  | C(3)-C(4)-C(5)    | 121.9(6) |
| C(7)-C(12)     | 1.515(9)  | N(2)-C(4)-C(5)    | 120.2(6) |
| C(8)-C(9)      | 1.364(9)  | C(7)-C(6)-C(11)   | 122.1(6) |
| C(9)-C(10)     | 1.365(9)  | C(7)-C(6)-N(1)    | 119.6(6) |
| C(10)-C(11)    | 1.393(9)  | C(11)-C(6)-N(1)   | 118.4(6) |
| C(11)-C(15)    | 1.518(9)  | C(6)-C(7)-C(8)    | 117.9(6) |
| C(12)-C(14)    | 1.520(10) | C(6)-C(7)-C(12)   | 122.3(6) |
| C(12)-C(13)    | 1.523(10) | C(8)-C(7)-C(12)   | 119.8(6) |
| C(15)-C(16)    | 1.518(9)  | C(9)-C(8)-C(7)    | 121.2(6) |
| C(15)-C(17)    | 1.528(10) | C(8)-C(9)-C(10)   | 119.9(6) |
| C(18)-C(19)    | 1.378(9)  | C(9)-C(10)-C(11)  | 122.1(6) |
| C(18)-C(23)    | 1.382(9)  | C(10)-C(11)-C(6)  | 116.8(6) |
| C(19)-C(20)    | 1.405(9)  | C(10)-C(11)-C(15) | 120.7(6) |
| C(19)-C(24)    | 1.518(9)  | C(6)-C(11)-C(15)  | 122.5(6) |
| C(20)-C(21)    | 1.359(9)  | C(7)-C(12)-C(14)  | 113.0(6) |
| C(21)-C(22)    | 1.380(9)  | C(7)-C(12)-C(13)  | 111.8(6) |
| C(22)-C(23)    | 1.411(9)  | C(14)-C(12)-C(13) | 108.6(6) |
| C(23)-C(27)    | 1.515(9)  | C(11)-C(15)-C(16) | 111.3(6) |
| C(24)-C(25)    | 1.516(9)  | C(11)-C(15)-C(17) | 111.9(6) |
| C(24)-C(26)    | 1.520(10) | C(16)-C(15)-C(17) | 110.5(6) |
| C(27)-C(29)    | 1.503(9)  | C(19)-C(18)-C(23) | 123.0(6) |
| C(27)-C(28)    | 1.545(9)  | C(19)-C(18)-N(2)  | 119.2(6) |
|                |           | C(23)-C(18)-N(2)  | 117.8(6) |
| C(2)-N(1)-B(1) | 119.6(5)  | C(18)-C(19)-C(20) | 117.6(6) |

|                   |          |                   |          |
|-------------------|----------|-------------------|----------|
| C(18)-C(19)-C(24) | 123.3(6) | C(22)-C(23)-C(27) | 118.6(6) |
| C(20)-C(19)-C(24) | 119.0(6) | C(25)-C(24)-C(19) | 112.9(6) |
| C(21)-C(20)-C(19) | 121.1(7) | C(25)-C(24)-C(26) | 109.6(6) |
| C(20)-C(21)-C(22) | 120.4(6) | C(19)-C(24)-C(26) | 110.4(6) |
| C(21)-C(22)-C(23) | 120.4(6) | C(29)-C(27)-C(23) | 114.1(5) |
| C(18)-C(23)-C(22) | 117.4(6) | C(29)-C(27)-C(28) | 109.1(6) |
| C(18)-C(23)-C(27) | 124.0(6) | C(23)-C(27)-C(28) | 110.8(6) |

---

## Crystallographic data for compound 4

|                                   |                                             |                               |
|-----------------------------------|---------------------------------------------|-------------------------------|
| Empirical formula                 | C72 H96 B2 Br2 N4                           |                               |
| Formula weight                    | 1198.97                                     |                               |
| Temperature                       | 150(2) K                                    |                               |
| Wavelength                        | 0.71073 Å                                   |                               |
| Crystal system                    | Triclinic                                   |                               |
| Space group                       | P-1                                         |                               |
| Unit cell dimensions              | a = 13.5298(6) Å                            | $\alpha = 91.285(3)^\circ$ .  |
|                                   | b = 15.1978(6) Å                            | $\beta = 96.864(4)^\circ$ .   |
|                                   | c = 17.1182(8) Å                            | $\gamma = 105.226(4)^\circ$ . |
| Volume                            | 3366.7(3) Å <sup>3</sup>                    |                               |
| Z                                 | 2                                           |                               |
| Density (calculated)              | 1.183 Mg/m <sup>3</sup>                     |                               |
| Absorption coefficient            | 1.246 mm <sup>-1</sup>                      |                               |
| F(000)                            | 1272                                        |                               |
| Crystal size                      | 0.30 x 0.26 x 0.20 mm <sup>3</sup>          |                               |
| Theta range for data collection   | 2.90 to 25.00°.                             |                               |
| Index ranges                      | -16 ≤ h ≤ 16, -18 ≤ k ≤ 18, -20 ≤ l ≤ 20    |                               |
| Reflections collected             | 35317                                       |                               |
| Independent reflections           | 11828 [R(int) = 0.0789]                     |                               |
| Completeness to theta = 25.00°    | 99.8 %                                      |                               |
| Absorption correction             | Semi-empirical from equivalents             |                               |
| Max. and min. transmission        | 0.7887 and 0.7062                           |                               |
| Refinement method                 | Full-matrix least-squares on F <sup>2</sup> |                               |
| Data / restraints / parameters    | 11828 / 175 / 743                           |                               |
| Goodness-of-fit on F <sup>2</sup> | 0.845                                       |                               |
| Final R indices [I > 2σ(I)]       | R1 = 0.0494, wR2 = 0.1019                   |                               |
| R indices (all data)              | R1 = 0.1206, wR2 = 0.1150                   |                               |
| Largest diff. peak and hole       | 0.765 and -0.419 e.Å <sup>-3</sup>          |                               |

Table 2. Bond lengths [Å] and angles [°] for 4.

|             |          |                |           |
|-------------|----------|----------------|-----------|
| Br(1)-B(1)  | 1.945(5) | C(23)-C(27)    | 1.524(7)  |
| N(1)-B(1)   | 1.399(6) | C(24)-C(25)    | 1.513(6)  |
| N(1)-C(2)   | 1.408(5) | C(24)-C(26)    | 1.534(6)  |
| N(1)-C(6)   | 1.452(5) | C(27)-C(29)    | 1.521(7)  |
| N(2)-B(1)   | 1.421(6) | C(27)-C(28)    | 1.541(6)  |
| N(2)-C(4)   | 1.428(5) | C(30)-C(31)    | 1.509(6)  |
| N(2)-C(18)  | 1.444(5) | C(31)-C(32)    | 1.375(6)  |
| N(3)-C(31)  | 1.357(5) | C(32)-C(33)    | 1.359(6)  |
| N(3)-B(2)   | 1.450(6) | C(33)-C(34)    | 1.505(6)  |
| N(3)-C(35)  | 1.475(5) | C(35)-C(40)    | 1.396(6)  |
| N(4)-C(33)  | 1.363(5) | C(35)-C(36)    | 1.398(6)  |
| N(4)-B(2)   | 1.467(6) | C(36)-C(37)    | 1.384(6)  |
| N(4)-C(47)  | 1.470(5) | C(36)-C(41)    | 1.523(7)  |
| B(2)-C(5)   | 1.538(6) | C(37)-C(38)    | 1.366(7)  |
| C(1)-C(2)   | 1.495(6) | C(38)-C(39)    | 1.377(7)  |
| C(2)-C(3)   | 1.348(6) | C(39)-C(40)    | 1.399(6)  |
| C(3)-C(4)   | 1.430(6) | C(40)-C(44)    | 1.519(7)  |
| C(4)-C(5)   | 1.349(5) | C(41)-C(43)    | 1.525(7)  |
| C(6)-C(11)  | 1.394(6) | C(41)-C(42)    | 1.529(7)  |
| C(6)-C(7)   | 1.401(6) | C(44)-C(46)    | 1.487(13) |
| C(7)-C(8)   | 1.398(6) | C(44)-C(45)    | 1.530(8)  |
| C(7)-C(12)  | 1.513(7) | C(47)-C(48)    | 1.405(6)  |
| C(8)-C(9)   | 1.375(7) | C(47)-C(52)    | 1.408(6)  |
| C(9)-C(10)  | 1.365(7) | C(48)-C(49)    | 1.387(6)  |
| C(10)-C(11) | 1.395(6) | C(48)-C(53)    | 1.505(7)  |
| C(11)-C(15) | 1.522(6) | C(49)-C(50)    | 1.362(7)  |
| C(12)-C(13) | 1.529(8) | C(50)-C(51)    | 1.380(6)  |
| C(12)-C(14) | 1.532(7) | C(51)-C(52)    | 1.368(6)  |
| C(15)-C(16) | 1.513(6) | C(52)-C(56)    | 1.516(6)  |
| C(15)-C(17) | 1.525(6) | C(53)-C(54)    | 1.532(6)  |
| C(18)-C(19) | 1.402(6) | C(53)-C(55)    | 1.533(6)  |
| C(18)-C(23) | 1.402(6) | C(56)-C(58)    | 1.522(6)  |
| C(19)-C(20) | 1.386(6) | C(56)-C(57)    | 1.534(7)  |
| C(19)-C(24) | 1.531(6) |                |           |
| C(20)-C(21) | 1.379(6) | B(1)-N(1)-C(2) | 117.6(4)  |
| C(21)-C(22) | 1.368(7) | B(1)-N(1)-C(6) | 123.8(4)  |
| C(22)-C(23) | 1.391(7) | C(2)-N(1)-C(6) | 118.6(4)  |



|                   |          |                   |          |
|-------------------|----------|-------------------|----------|
| B(1)-N(2)-C(4)    | 121.5(4) | C(16)-C(15)-C(17) | 110.3(4) |
| B(1)-N(2)-C(18)   | 121.1(4) | C(11)-C(15)-C(17) | 112.0(4) |
| C(4)-N(2)-C(18)   | 117.2(3) | C(19)-C(18)-C(23) | 121.6(4) |
| C(31)-N(3)-B(2)   | 122.4(4) | C(19)-C(18)-N(2)  | 120.1(4) |
| C(31)-N(3)-C(35)  | 115.5(4) | C(23)-C(18)-N(2)  | 118.3(4) |
| B(2)-N(3)-C(35)   | 121.9(4) | C(20)-C(19)-C(18) | 118.1(4) |
| C(33)-N(4)-B(2)   | 121.3(4) | C(20)-C(19)-C(24) | 121.0(5) |
| C(33)-N(4)-C(47)  | 116.2(4) | C(18)-C(19)-C(24) | 120.9(4) |
| B(2)-N(4)-C(47)   | 121.6(4) | C(21)-C(20)-C(19) | 120.8(5) |
| N(1)-B(1)-N(2)    | 121.5(4) | C(22)-C(21)-C(20) | 120.5(5) |
| N(1)-B(1)-Br(1)   | 118.8(4) | C(21)-C(22)-C(23) | 121.2(5) |
| N(2)-B(1)-Br(1)   | 119.7(4) | C(22)-C(23)-C(18) | 117.7(5) |
| N(3)-B(2)-N(4)    | 113.7(4) | C(22)-C(23)-C(27) | 119.8(4) |
| N(3)-B(2)-C(5)    | 123.5(4) | C(18)-C(23)-C(27) | 122.5(4) |
| N(4)-B(2)-C(5)    | 122.6(4) | C(25)-C(24)-C(19) | 113.2(4) |
| C(3)-C(2)-N(1)    | 120.3(4) | C(25)-C(24)-C(26) | 107.1(4) |
| C(3)-C(2)-C(1)    | 121.5(4) | C(19)-C(24)-C(26) | 112.7(4) |
| N(1)-C(2)-C(1)    | 118.1(4) | C(29)-C(27)-C(23) | 109.3(4) |
| C(2)-C(3)-C(4)    | 125.9(4) | C(29)-C(27)-C(28) | 110.3(4) |
| C(5)-C(4)-N(2)    | 123.7(4) | C(23)-C(27)-C(28) | 113.8(5) |
| C(5)-C(4)-C(3)    | 123.1(4) | N(3)-C(31)-C(32)  | 119.9(4) |
| N(2)-C(4)-C(3)    | 113.2(4) | N(3)-C(31)-C(30)  | 120.3(4) |
| C(4)-C(5)-B(2)    | 124.4(4) | C(32)-C(31)-C(30) | 119.8(4) |
| C(11)-C(6)-C(7)   | 122.3(4) | C(33)-C(32)-C(31) | 121.6(5) |
| C(11)-C(6)-N(1)   | 118.6(4) | C(32)-C(33)-N(4)  | 120.5(4) |
| C(7)-C(6)-N(1)    | 119.1(4) | C(32)-C(33)-C(34) | 118.6(4) |
| C(8)-C(7)-C(6)    | 117.0(4) | N(4)-C(33)-C(34)  | 120.8(4) |
| C(8)-C(7)-C(12)   | 120.1(5) | C(40)-C(35)-C(36) | 122.2(4) |
| C(6)-C(7)-C(12)   | 122.9(4) | C(40)-C(35)-N(3)  | 118.3(4) |
| C(9)-C(8)-C(7)    | 121.4(5) | C(36)-C(35)-N(3)  | 119.2(4) |
| C(10)-C(9)-C(8)   | 120.3(5) | C(37)-C(36)-C(35) | 117.7(5) |
| C(9)-C(10)-C(11)  | 121.2(5) | C(37)-C(36)-C(41) | 118.6(5) |
| C(6)-C(11)-C(10)  | 117.8(5) | C(35)-C(36)-C(41) | 123.6(4) |
| C(6)-C(11)-C(15)  | 123.1(4) | C(38)-C(37)-C(36) | 121.6(5) |
| C(10)-C(11)-C(15) | 119.1(4) | C(37)-C(38)-C(39) | 119.8(5) |
| C(7)-C(12)-C(13)  | 114.0(5) | C(38)-C(39)-C(40) | 121.5(5) |
| C(7)-C(12)-C(14)  | 110.6(5) | C(35)-C(40)-C(39) | 116.9(5) |
| C(13)-C(12)-C(14) | 109.4(5) | C(35)-C(40)-C(44) | 123.8(4) |
| C(16)-C(15)-C(11) | 112.1(4) | C(39)-C(40)-C(44) | 119.3(5) |

|                   |          |                   |          |
|-------------------|----------|-------------------|----------|
| C(36)-C(41)-C(43) | 114.0(4) | C(50)-C(49)-C(48) | 121.8(5) |
| C(36)-C(41)-C(42) | 109.5(4) | C(49)-C(50)-C(51) | 119.8(5) |
| C(43)-C(41)-C(42) | 109.8(5) | C(52)-C(51)-C(50) | 121.9(5) |
| C(46)-C(44)-C(40) | 115.8(7) | C(51)-C(52)-C(47) | 117.5(4) |
| C(46)-C(44)-C(45) | 98.3(9)  | C(51)-C(52)-C(56) | 119.3(5) |
| C(40)-C(44)-C(45) | 112.0(5) | C(47)-C(52)-C(56) | 123.1(5) |
| C(48)-C(47)-C(52) | 121.7(4) | C(48)-C(53)-C(54) | 110.4(5) |
| C(48)-C(47)-N(4)  | 121.3(4) | C(48)-C(53)-C(55) | 112.7(4) |
| C(52)-C(47)-N(4)  | 116.7(4) | C(54)-C(53)-C(55) | 108.0(4) |
| C(49)-C(48)-C(47) | 117.2(5) | C(52)-C(56)-C(58) | 112.2(4) |
| C(49)-C(48)-C(53) | 119.2(4) | C(52)-C(56)-C(57) | 111.0(4) |
| C(47)-C(48)-C(53) | 123.6(5) | C(58)-C(56)-C(57) | 110.2(4) |

---

## Computational Methods

DFT calculations of the compounds **2-4** were performed at the B3LYP level using 6-31G(d) basis set with the GAUSSIAN-03 program package.<sup>[3]</sup> The structure obtained by X-ray analysis was used as the input for these calculation of compounds **2-4**. Cartesian coordinates of optimized structures are shown in Table 3-5.

Table 3. Cartesian coordination (x, y, z) of optimized structure for **2**

|    |           |           |           |   |           |           |           |
|----|-----------|-----------|-----------|---|-----------|-----------|-----------|
| Br | 0.027059  | 0.000123  | -1.839219 | H | -3.122127 | -0.879076 | 2.71677   |
| N  | 1.251562  | -0.0001   | 0.807046  | H | -3.122246 | 0.877982  | 2.717102  |
| C  | 2.427351  | 0.000026  | 2.955392  | H | 4.900553  | 2.140231  | -1.034328 |
| B  | 0.015979  | -0.000081 | 0.105586  | H | 6.010311  | -0.000135 | -1.574807 |
| N  | -1.237762 | -0.000204 | 0.797517  | H | 4.900698  | -2.140475 | -1.033914 |
| C  | 1.282962  | -0.000102 | 2.235872  | H | 1.565711  | -2.380526 | 0.672857  |
| C  | -0.025424 | -0.000283 | 2.869927  | H | 1.507651  | -2.63425  | -1.809902 |
| C  | -1.207195 | -0.000335 | 2.215422  | H | 1.560106  | -4.208819 | -0.982024 |
| C  | -2.514158 | -0.000553 | 2.96006   | H | 3.016479  | -3.562435 | -1.757414 |
| C  | 2.533708  | -0.000087 | 0.131945  | H | 4.311209  | -3.737771 | 0.55035   |
| C  | 3.154404  | 1.231118  | -0.165199 | H | 2.836206  | -4.398922 | 1.267529  |
| C  | 4.409     | 1.203413  | -0.786344 | H | 3.596355  | -2.96072  | 1.976314  |
| C  | 5.035523  | -0.000121 | -1.093782 | H | 1.565385  | 2.380403  | 0.672064  |
| C  | 4.409084  | -1.203643 | -0.786104 | H | 3.59544   | 2.960242  | 1.976481  |
| C  | 3.154492  | -1.231307 | -0.164961 | H | 2.83601   | 4.398665  | 1.267362  |
| C  | 2.494909  | -2.574565 | 0.12968   | H | 4.311203  | 3.737135  | 0.550889  |
| C  | 2.122145  | -3.288978 | -1.184688 | H | 3.017216  | 3.562418  | -1.757524 |
| C  | 3.36484   | -3.467011 | 1.033369  | H | 1.56073   | 4.208977  | -0.982512 |
| C  | 2.494823  | 2.574414  | 0.129287  | H | 1.508243  | 2.634518  | -1.810606 |
| C  | 3.364523  | 3.466625  | 1.033441  | H | -4.893903 | 2.139781  | -1.042535 |
| C  | 2.122657  | 3.289054  | -1.185114 | H | -6.010453 | 0.000707  | -1.568796 |
| C  | -2.524088 | 0.000038  | 0.126624  | H | -4.894529 | -2.138791 | -1.042946 |
| C  | -3.144382 | 1.231477  | -0.179179 | H | -1.564809 | -2.395422 | 0.662247  |
| C  | -4.402757 | 1.203422  | -0.7928   | H | -2.93052  | -3.490425 | -1.85481  |
| C  | -5.032776 | 0.000521  | -1.093875 | H | -1.485989 | -4.151263 | -1.066611 |
| C  | -4.403108 | -1.202627 | -0.79303  | H | -1.432963 | -2.543349 | -1.826506 |
| C  | -3.144736 | -1.231165 | -0.179438 | H | -3.654845 | -3.081547 | 1.86767   |
| C  | -2.47595  | -2.577764 | 0.084475  | H | -2.809212 | -4.45475  | 1.132879  |
| C  | -2.054842 | -3.231404 | -1.247549 | H | -4.27108  | -3.811364 | 0.377542  |
| C  | -3.356942 | -3.530791 | 0.913441  | H | -1.564041 | 2.395104  | 0.662608  |
| C  | -2.475263 | 2.577842  | 0.08509   | H | -4.270175 | 3.811525  | 0.379062  |
| C  | -3.355916 | 3.530694  | 0.914621  | H | -2.808031 | 4.454522  | 1.134221  |
| C  | -2.054261 | 3.231921  | -1.246746 | H | -3.653593 | 3.081154  | 1.868778  |
| H  | 2.370787  | 0.000004  | 4.038002  | H | -1.432629 | 2.543955  | -1.826083 |
| H  | 3.409626  | 0.000125  | 2.503648  | H | -1.485153 | 4.151568  | -1.065533 |
| H  | -0.034718 | -0.000404 | 3.953948  | H | -2.929969 | 3.491412  | -1.853762 |
| H  | -2.324225 | -0.000744 | 4.03607   |   |           |           |           |

Table 4. Cartesian coordination (x, y, z) of optimized structure for **3**

|    |           |           |           |   |           |           |           |
|----|-----------|-----------|-----------|---|-----------|-----------|-----------|
| Br | 0.000016  | 0.000463  | -1.825519 | H | -4.274961 | 3.800782  | 0.424843  |
| N  | -1.242194 | -0.000073 | 0.819842  | H | 1.548871  | 2.419715  | 0.646853  |
| C  | -2.54353  | 0.000373  | 0.132734  | H | -6.006057 | 0.001652  | -1.557846 |
| N  | 1.242196  | -0.000471 | 0.819836  | H | 0         | -0.001215 | 3.93074   |
| C  | -1.222998 | -0.000509 | 2.182418  | H | -4.89472  | -2.137682 | -1.036738 |
| B  | -0.000004 | -0.000042 | 0.076758  | H | 1.547615  | -2.420615 | 0.643958  |
| C  | -2.477983 | -2.588715 | 0.087911  | H | 4.277188  | 3.799747  | 0.425081  |
| C  | 4.401394  | -1.205229 | -0.785226 | H | 3.625079  | 3.078134  | 1.901511  |
| C  | -3.347321 | 3.53044   | 0.940038  | H | 2.808299  | 4.458348  | 1.14936   |
| C  | 2.47718   | 2.588689  | 0.08839   | H | -1.546734 | 2.420182  | 0.644168  |
| C  | -5.029227 | 0.00129   | -1.083302 | H | 4.894098  | 2.138602  | -1.036216 |
| C  | -0.000001 | -0.000908 | 2.848768  | H | -4.892536 | 2.140148  | -1.037974 |
| C  | -4.402211 | -1.203838 | -0.784391 | H | 3.111851  | -0.878777 | 2.707463  |
| C  | 2.476183  | -2.589455 | 0.085891  | H | 2.303194  | -0.002022 | 4.02791   |
| C  | 3.350053  | 3.529366  | 0.94116   | H | 3.111764  | 0.876424  | 2.708559  |
| C  | 1.222997  | -0.000919 | 2.182417  | H | 3.622991  | -3.080323 | 1.899328  |
| C  | -3.143067 | 1.239635  | -0.170829 | H | 4.275769  | -3.801061 | 0.422766  |
| C  | -2.475488 | 2.589433  | 0.086539  | H | 2.806373  | -4.459899 | 1.145828  |
| C  | -3.144379 | -1.238451 | -0.170026 | H | -3.627886 | -3.078906 | 1.899573  |
| C  | 3.143478  | -1.239427 | -0.171011 | H | -2.809856 | -4.458722 | 1.14802   |
| C  | 4.401872  | 1.204554  | -0.784069 | H | -4.278073 | -3.800338 | 0.422219  |
| C  | -4.400967 | 1.205946  | -0.785112 | H | -2.980452 | 3.5127    | -1.834567 |
| C  | 3.143977  | 1.238656  | -0.169806 | H | -1.477248 | 2.578792  | -1.854506 |
| C  | 2.50625   | -0.001367 | 2.955817  | H | -1.526011 | 4.177127  | -1.074808 |
| C  | 3.348403  | -3.530876 | 0.93853   | H | 1.527341  | 4.176858  | -1.072098 |
| C  | -3.351611 | -3.52983  | 0.939434  | H | 1.47715   | 2.578538  | -1.851771 |
| C  | -2.089973 | 3.254502  | -1.251333 | H | 2.980805  | 3.511706  | -1.833143 |
| C  | 2.090705  | 3.253962  | -1.249121 | H | -2.980321 | -3.510476 | -1.834526 |
| C  | -2.090592 | -3.253232 | -1.249719 | H | -1.527477 | -4.176313 | -1.072858 |
| C  | 2.090263  | -3.253765 | -1.252244 | H | -1.476537 | -2.577512 | -1.851532 |
| C  | 2.543522  | -0.000413 | 0.132743  | H | 1.477336  | -2.577721 | -1.854843 |
| C  | -2.506268 | -0.000874 | 2.95579   | H | 1.526407  | -4.176527 | -1.0761   |
| C  | 5.029299  | -0.000318 | -1.083144 | H | 2.980588  | -3.511543 | -1.835898 |
| H  | -1.550081 | -2.420198 | 0.647189  | H | -3.110395 | -0.879936 | 2.709542  |
| H  | 4.893268  | -2.139228 | -1.038252 | H | -3.113237 | 0.875259  | 2.706393  |
| H  | -2.805234 | 4.4594    | 1.147471  | H | -2.303241 | 0.001209  | 4.027887  |
| H  | -3.621391 | 3.079453  | 1.900777  | H | 6.006164  | -0.000288 | -1.557615 |

Table 5. Cartesian coordination (x, y, z) of optimized structure for **4**

|    |           |           |           |   |           |           |           |
|----|-----------|-----------|-----------|---|-----------|-----------|-----------|
| Br | 3.81389   | -0.015813 | 2.065608  | C | 2.045068  | -3.168429 | 3.213137  |
| N  | 1.094114  | -0.00657  | 0.984991  | C | 2.061879  | 3.134458  | 3.244834  |
| N  | 2.934399  | -0.000316 | -0.703355 | C | -4.061846 | 1.937098  | 2.617124  |
| N  | -3.060549 | -1.232014 | -1.313121 | C | -4.5251   | -2.050678 | 1.133262  |
| N  | -3.050994 | 1.249249  | -1.309983 | C | 0.473692  | -3.353405 | -2.202675 |
| C  | 1.956707  | 0.006733  | -1.707462 | C | -5.977817 | 2.512065  | 1.06699   |
| C  | 4.34307   | -0.001123 | -1.082096 | C | -0.302266 | -3.595971 | 2.360722  |
| C  | -1.251262 | -0.002091 | 0.217618  | C | -1.362108 | -3.741115 | -3.883821 |
| C  | -4.485203 | 0.015785  | -2.75402  | C | 4.942196  | -3.251351 | 0.229788  |
| C  | 0.639028  | 0.007243  | -1.381282 | C | 4.422775  | -3.524469 | -2.241123 |
| C  | 0.651661  | -0.010894 | 2.372187  | C | -4.087153 | -1.934392 | 2.607715  |
| C  | -4.041955 | 1.229681  | -2.24613  | C | -6.000504 | -2.492182 | 1.048133  |
| C  | -2.797372 | -2.565589 | -0.739992 | H | -1.548626 | -0.012912 | 1.265463  |
| C  | 0.097544  | 0.000103  | -0.035252 | H | -5.262153 | 0.019722  | -3.50674  |
| B  | 2.487984  | -0.00685  | 0.65852   | H | -0.074877 | 0.011561  | -2.196304 |
| C  | -2.780017 | 2.579021  | -0.731355 | H | -0.239685 | 2.120765  | 4.864732  |
| C  | 0.447135  | 1.219436  | 3.035733  | H | 6.877525  | -2.14093  | -1.817506 |
| B  | -2.408446 | 0.005344  | -0.814851 | H | 3.285531  | 2.409331  | -0.800669 |
| C  | -0.077651 | 1.186779  | 4.334334  | H | -5.32252  | 2.915254  | -1.89486  |
| C  | 5.003824  | -1.233895 | -1.275329 | H | -5.384143 | 2.268806  | -3.544954 |
| C  | 0.438131  | -1.244917 | 3.02595   | H | -4.011259 | 3.261135  | -3.00121  |
| C  | -3.568634 | 2.989379  | 0.368343  | H | -1.192109 | 5.493824  | -1.431462 |
| C  | 5.008457  | 1.230845  | -1.263767 | H | 1.213965  | 2.390244  | 1.421578  |
| C  | 6.347207  | -1.204873 | -1.669314 | H | 3.018306  | 0.890668  | -3.36826  |
| C  | -3.591239 | -2.977694 | 0.355292  | H | 1.534792  | 0.018031  | -3.807093 |
| C  | 4.348315  | 2.581833  | -0.999775 | H | 3.015674  | -0.863612 | -3.37727  |
| C  | -1.895902 | 3.463468  | -1.387357 | H | 6.885837  | 2.135726  | -1.796818 |
| C  | -4.722135 | 2.489189  | -2.705418 | H | -0.254881 | -2.155666 | 4.847977  |
| C  | -1.854692 | 4.790024  | -0.937508 | H | -1.220129 | -5.483943 | -1.449065 |
| C  | 0.871337  | 2.561829  | 2.447177  | H | -4.077394 | 4.668659  | 1.610846  |
| C  | 2.402954  | 0.013252  | -3.143597 | H | -0.774064 | -0.020007 | 5.975369  |
| C  | -4.049831 | -1.202813 | -2.250733 | H | 6.009073  | 3.485107  | 0.10827   |
| C  | 6.351859  | 1.200368  | -1.657766 | H | 4.887406  | 2.552041  | 1.111833  |
| C  | -0.08626  | -1.218738 | 4.324869  | H | 4.421801  | 4.160544  | 0.510524  |
| C  | -1.881332 | -4.779631 | -0.953959 | H | -4.449658 | 1.063186  | 0.703335  |
| C  | -3.479464 | 4.328009  | 0.77111   | H | -2.644826 | -6.258748 | 0.409194  |
| C  | -0.366357 | -0.017481 | 4.968131  | H | 8.060077  | -0.003098 | -2.172066 |
| C  | 4.953014  | 3.234544  | 0.260358  | H | 1.18887   | -2.409649 | 1.399663  |
| C  | -4.504279 | 2.063004  | 1.144836  | H | -1.073008 | 1.986311  | -2.702614 |
| C  | -2.679685 | -5.219606 | 0.095281  | H | -4.112071 | -4.660826 | 1.587549  |
| C  | 7.017676  | -0.002548 | -1.865944 | H | 3.276684  | -2.409894 | -0.821506 |
| C  | 0.852144  | -2.585682 | 2.426471  | H | -4.02456  | -3.225258 | -3.026765 |
| C  | -1.914986 | -3.45068  | -1.397275 | H | -5.400892 | -2.227795 | -3.551518 |
| C  | -0.984814 | 3.066193  | -2.548807 | H | -5.329233 | -2.892396 | -1.908719 |
| C  | -3.509714 | -4.318747 | 0.751567  | H | 5.474653  | 3.798501  | -2.44114  |
| C  | 4.338526  | -2.584659 | -1.023555 | H | 3.901327  | 4.464689  | -1.996321 |
| C  | -4.734229 | -2.45697  | -2.718077 | H | 4.000856  | 3.088704  | -3.110588 |
| C  | 4.43773   | 3.532645  | -2.208463 | H | -2.606677 | 6.265671  | 0.435791  |
| C  | -2.647395 | 5.228321  | 0.116699  | H | -1.083312 | -1.970768 | -2.704352 |
| C  | -0.996923 | -3.051132 | -2.552342 | H | -1.106515 | 3.197931  | 1.777374  |
| C  | -0.278191 | 3.577584  | 2.379748  | H | 0.06949   | 4.513124  | 1.927156  |
| C  | -1.357362 | 3.759464  | -3.876603 | H | -0.66392  | 3.820619  | 3.376693  |
| C  | 0.48824   | 3.366736  | -2.207943 | H | -2.356593 | 3.487512  | -4.231253 |

|   |           |           |           |   |           |           |           |
|---|-----------|-----------|-----------|---|-----------|-----------|-----------|
| H | -0.645634 | 3.474452  | -4.659437 | H | -6.344056 | 2.556145  | 0.035311  |
| H | -1.322642 | 4.850134  | -3.780046 | H | -0.680012 | -3.846157 | 3.358935  |
| H | 0.667055  | 4.444625  | -2.129868 | H | 0.037532  | -4.52896  | 1.89706   |
| H | 1.143236  | 2.983211  | -2.997347 | H | -1.134426 | -3.208007 | 1.769023  |
| H | 0.780925  | 2.902356  | -1.262861 | H | -1.324952 | -4.831988 | -3.790785 |
| H | 1.754279  | -3.43029  | 4.236938  | H | -0.648016 | -3.451679 | -4.662855 |
| H | 2.860759  | -2.443761 | 3.267032  | H | -2.360764 | -3.470778 | -4.241428 |
| H | 2.417156  | -4.078365 | 2.727809  | H | 5.997118  | -3.504444 | 0.074041  |
| H | 1.765845  | 3.392455  | 4.268095  | H | 4.40779   | -4.177566 | 0.472264  |
| H | 2.441649  | 4.045067  | 2.76677   | H | 4.880225  | -2.576301 | 1.087435  |
| H | 2.87377   | 2.405583  | 3.300167  | H | 3.986594  | -3.070426 | -3.138576 |
| H | -3.030811 | 1.58087   | 2.704186  | H | 3.882896  | -4.456298 | -2.037006 |
| H | -4.713403 | 1.23465   | 3.148168  | H | 5.458345  | -3.792301 | -2.477555 |
| H | -4.12677  | 2.900274  | 3.134872  | H | -4.158816 | -2.899779 | 3.120456  |
| H | -4.464173 | -1.048933 | 0.696948  | H | -4.736984 | -1.231243 | 3.139973  |
| H | 0.761032  | -2.888938 | -1.255961 | H | -3.054566 | -1.584008 | 2.700494  |
| H | 1.134077  | -2.971111 | -2.98819  | H | -6.149386 | -3.483934 | 1.488427  |
| H | 0.650374  | -4.431517 | -2.122771 | H | -6.362998 | -2.530403 | 0.014899  |
| H | -6.120167 | 3.502823  | 1.511639  | H | -6.636869 | -1.789347 | 1.597278  |
| H | -6.615557 | 1.810244  | 1.615828  |   |           |           |           |

---

## References

- [1] J. Feldman, S. J. MacLain, A. Parthasarathy, W. J. Marshall, J. C. Calabrese, S. D. Arthur, *Organometallics* **1997**, *16*, 4511.
- [2] Sheldrick, G. M. *SHELX-97 Program for Crystal Structure Determination*, Universität Göttingen (Germany) **1997**.
- [3] (a) Gaussian 03, Revision E.01, M. J. Frisch, G. W. Trucks, H. B. Schlegel, G. E. Scuseria, M. A. Robb, J. R. Cheeseman, J. A. Montgomery, Jr., T. Vreven, K. N. Kudin, J. C. Burant, J. M. Millam, S. S. Iyengar, J. Tomasi, V. Barone, B. Mennucci, M. Cossi, G. Scalmani, N. Rega, G. A. Petersson, H. Nakatsuji, M. Hada, M. Ehara, K. Toyota, R. Fukuda, J. Hasegawa, M. Ishida, T. Nakajima, Y. Honda, O. Kitao, H. Nakai, M. Klene, X. Li, J. E. Knox, H. P. Hratchian, J. B. Cross, V. Bakken, C. Adamo, J. Jaramillo, R. Gomperts, R. E. Stratmann, O. Yazyev, A. J. Austin, R. Cammi, C. Pomelli, J. W. Ochterski, P. Y. Ayala, K. Morokuma, G. A. Voth, P. Salvador, J. J. Dannenberg, V. G. Zakrzewski, S. Dapprich, A. D. Daniels, M. C. Strain, O. Farkas, D. K. Malick, A. D. Rabuck, K. Raghavachari, J. B. Foresman, J. V. Ortiz, Q. Cui, A. G. Baboul, S. Clifford, J. Cioslowski, B. B. Stefanov, G. Liu, A. Liashenko, P. Piskorz, I. Komaromi, R. L. Martin, D. J. Fox, T. Keith, M. A. Al-Laham, C. Y. Peng, A. Nanayakkara, M. Challacombe, P. M. W. Gill, B. Johnson, W. Chen, M. W. Wong, C. Gonzalez, and J. A. Pople, Gaussian, Inc., Wallingford CT, 2004; (b) A. D. Becke, *J. Chem. Phys.* **1993**, *98*, 5648; (c) C. Lee, W. Yang, R. G. Parr, *Phys. Rev. B* **1988**, *37*, 785 ; (d) B. Miehl, A. Savin, H. Stoll, H. Preuss, *Chem. Phys. Lett.* **1989**, *157*, 200.
